# Supplementary material for: Oyster (Crassostrea gigas) Extract Attenuates Dextran Sulfate Sodium-Induced Acute Experimental Colitis by Improving Gut Microbiota and Short-Chain Fatty Acids Compositions in Mice
Source: MDPI journal article supplement (doi:10.3390/foods11030373), 2022-01-27
Supplement: s1 [file s1]

## Supplementary Materials

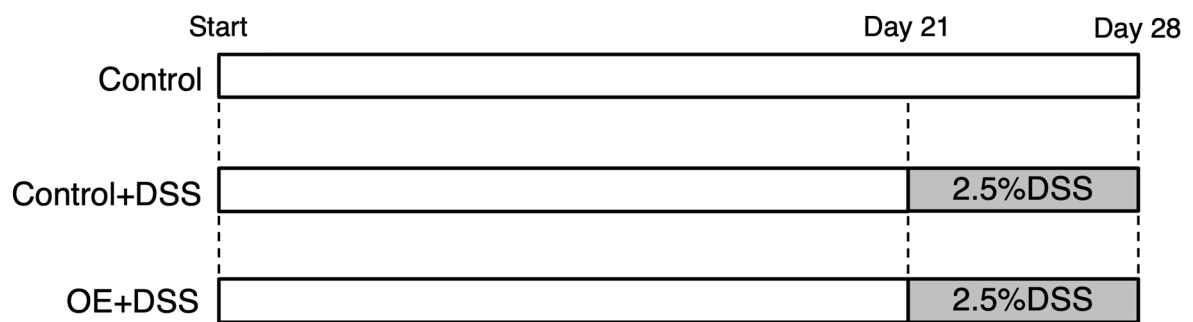

**Figure S1.** Schematic diagram of DSS-treated mice. DSS, dodecyl sodium sulfate; OE, oyster extract.

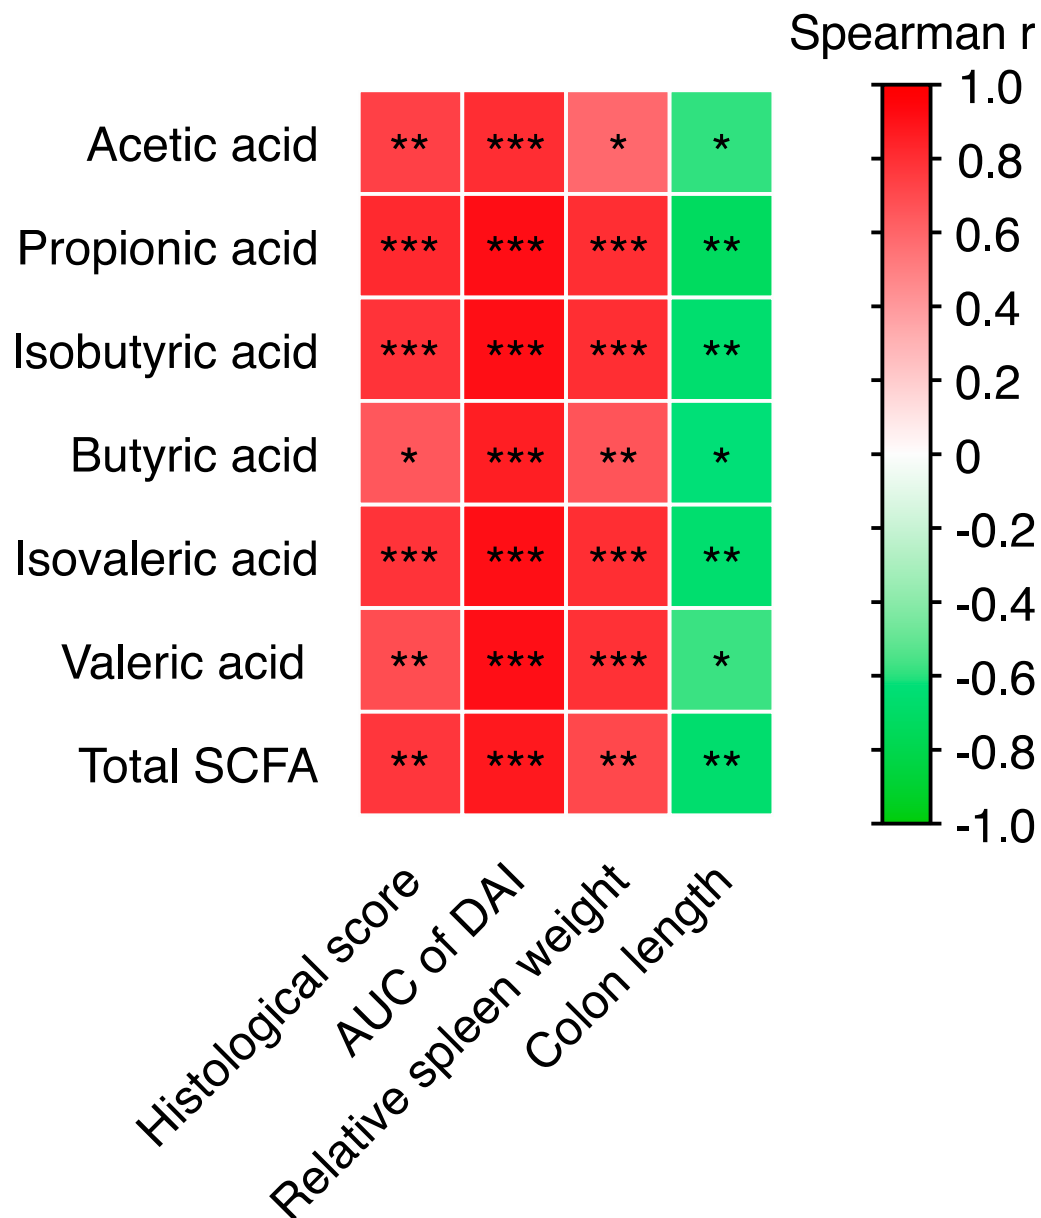

**Figure S2.** Heatmap representation of Spearman's correlation coefficient between fecal each SCFA contents and the indicators of the severity of DSS-induced colitis. Red: position correlations; Green: negative correlations. \*  $p < 0.05$ , \*\*  $p < 0.01$ , and \*\*\*  $p < 0.001$ .

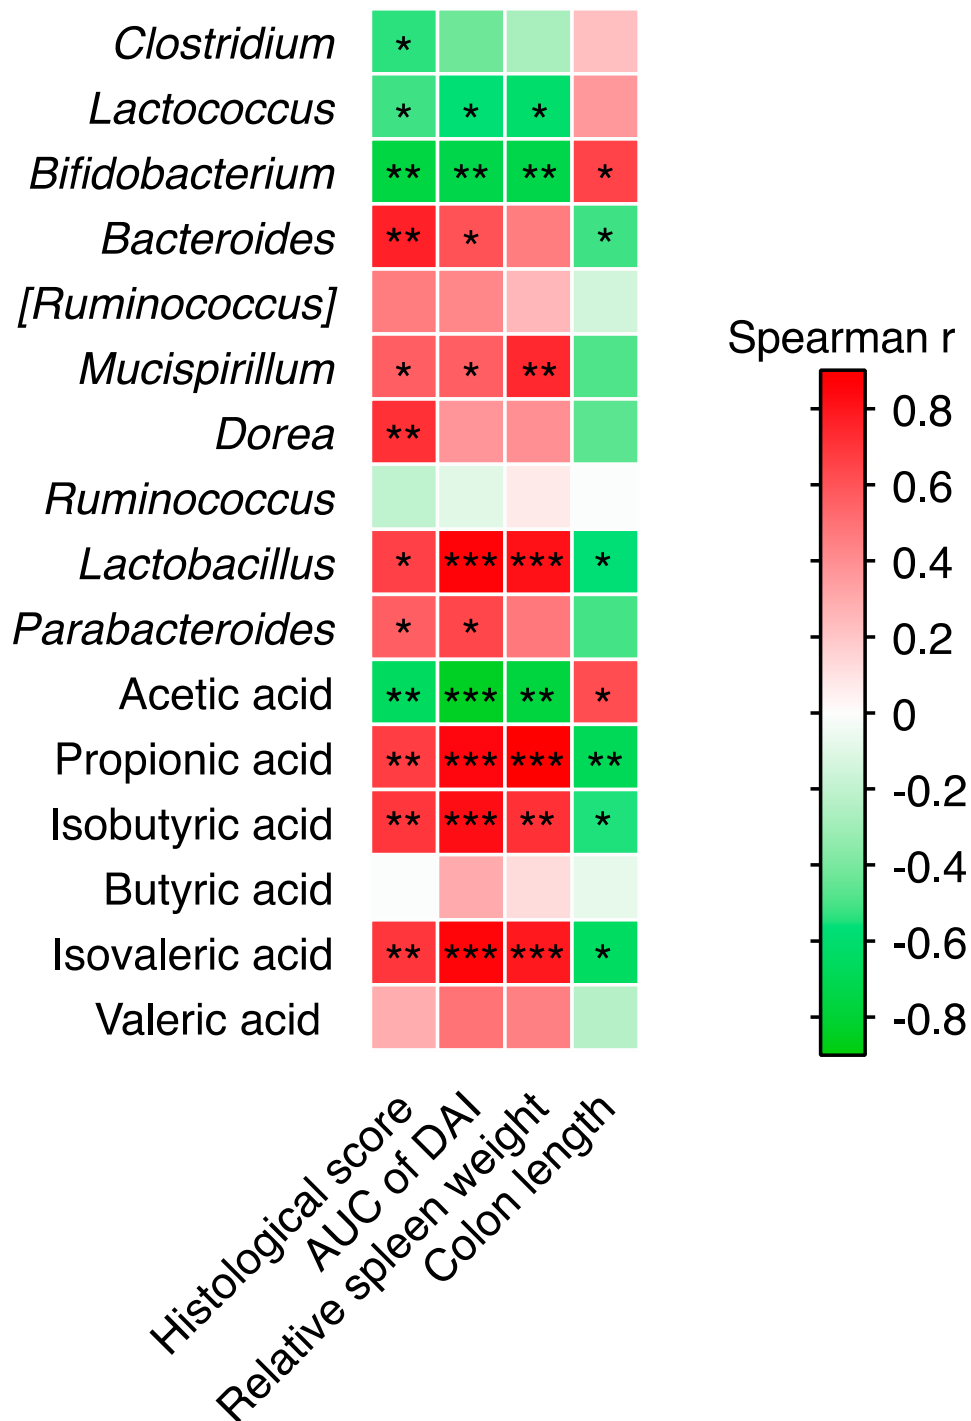

**Figure S3.** Heatmap representation of Spearman's correlation coefficient between fecal environments (relative bacteria and each SCFA compositions) and the indicators of the severity of DSS-induced colitis. Red: position correlations; Green: negative correlations. \*  $p < 0.05$ , \*\*  $p < 0.01$ , and \*\*\*  $p < 0.001$ .

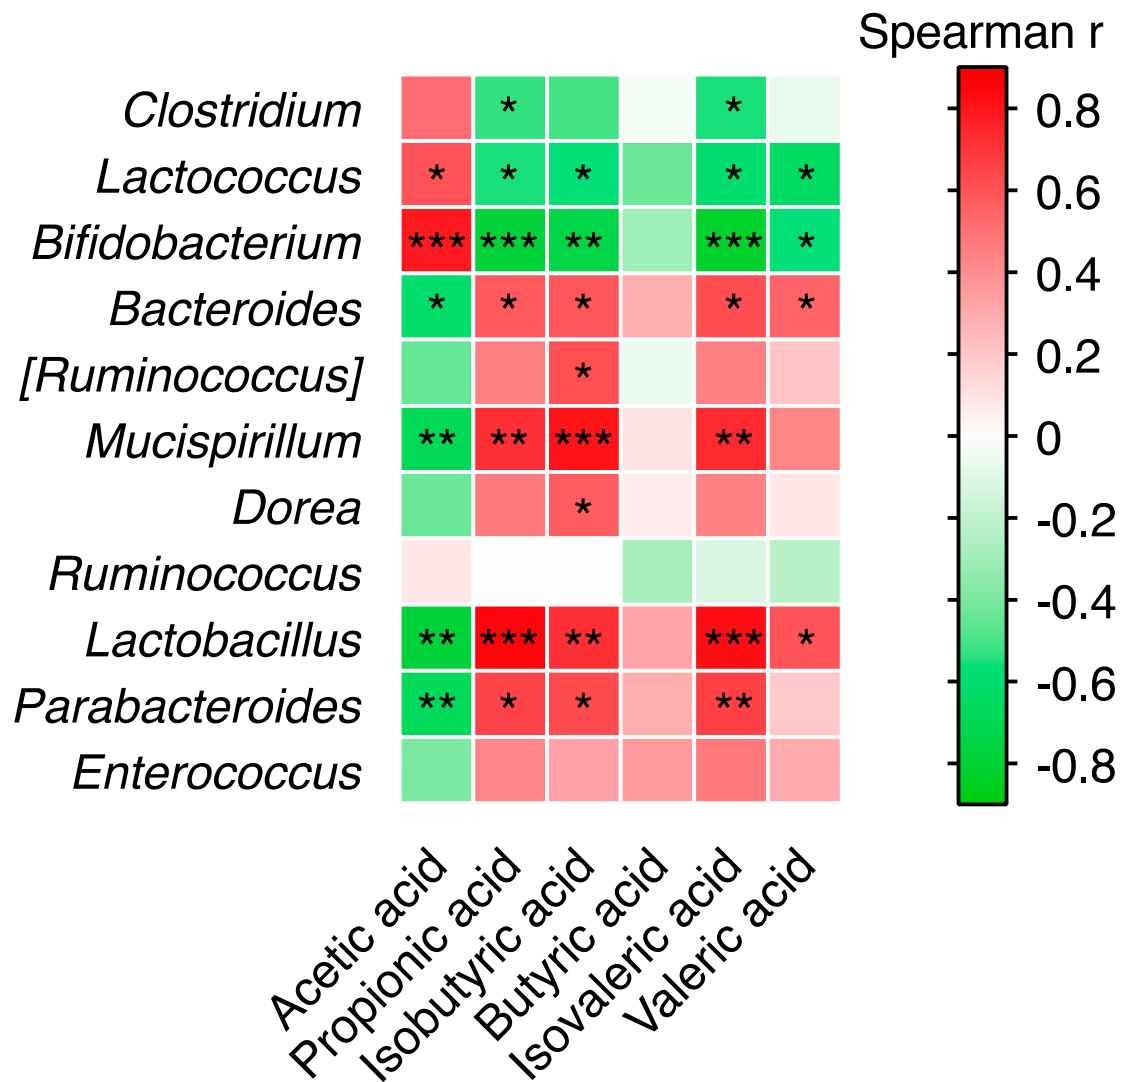

**Figure S4.** Heatmap representation of Spearman's correlation coefficient between relative bacteria and each SCFA compositions in the feces of DSS-treated mice. Red: position correlations; Green: negative correlations. \*  $p < 0.05$ , \*\*  $p < 0.01$ , and \*\*\*  $p < 0.001$ .

**Table S1.** Growth parameters, organs weights, and serum biochemical parameters in DSS-treated mice.

|                              | Groups      |                 |             |
|------------------------------|-------------|-----------------|-------------|
|                              | Control     | Control+DSS     | OE+DSS      |
| Growth parameters            |             |                 |             |
| Food intake (g/day)          | 2.56 ± 0.08 | 2.40 ± 0.17     | 2.37 ± 0.13 |
| Water intake (g/day)         | 8.24 ± 0.74 | 7.85 ± 0.67     | 7.47 ± 0.65 |
| DSS solution intake (g/day)  | -           | 9.58 ± 0.50     | 9.06 ± 0.52 |
| Organ weights (g/100g BW)    |             |                 |             |
| Liver                        | 4.19 ± 0.17 | 4.52 ± 0.16     | 4.40 ± 0.18 |
| Kidney                       | 1.16 ± 0.03 | 1.19 ± 0.02     | 1.16 ± 0.01 |
| Cecum                        | 0.97 ± 0.11 | 0.57 ± 0.05 **  | 0.80 ± 0.11 |
| Serum biochemical parameters |             |                 |             |
| Total protein                | 4.63 ± 0.05 | 3.79 ± 0.10 *** | 3.85 ± 0.13 |
| Albumin                      | 2.81 ± 0.04 | 2.06 ± 0.07 *** | 1.96 ± 0.07 |
| AST                          | 42.6 ± 1.6  | 34.9 ± 1.2 **   | 40.8 ± 2.8  |
| ALT                          | 15.0 ± 1.5  | 11.1 ± 1.0      | 11.4 ± 1.8  |
| CPK                          | 33.9 ± 1.5  | 53.1 ± 4.7 **   | 45.5 ± 7.2  |
| LDH                          | 176 ± 17    | 147 ± 21        | 150 ± 17    |

The values shown are the mean ± SEM (n = 7-8 per group). Data were analyzed using one-way analysis of variance followed by Holm-Sidak's multiple comparisons test between the control vs. control+DSS and control+DSS vs. OE+DSS groups. \*\*  $p < 0.01$  and \*\*\*  $p < 0.001$  vs control group. ALT, alanine aminotransferase; AST, aspartate aminotransferase; BW, body weight; CPK, creatine phosphokinase; DSS, dodecyl sodium sulfate; LDH, lactate dehydrogenase.
